# THE AMERICAN JOURNAL OF PSYCHIATRY

---

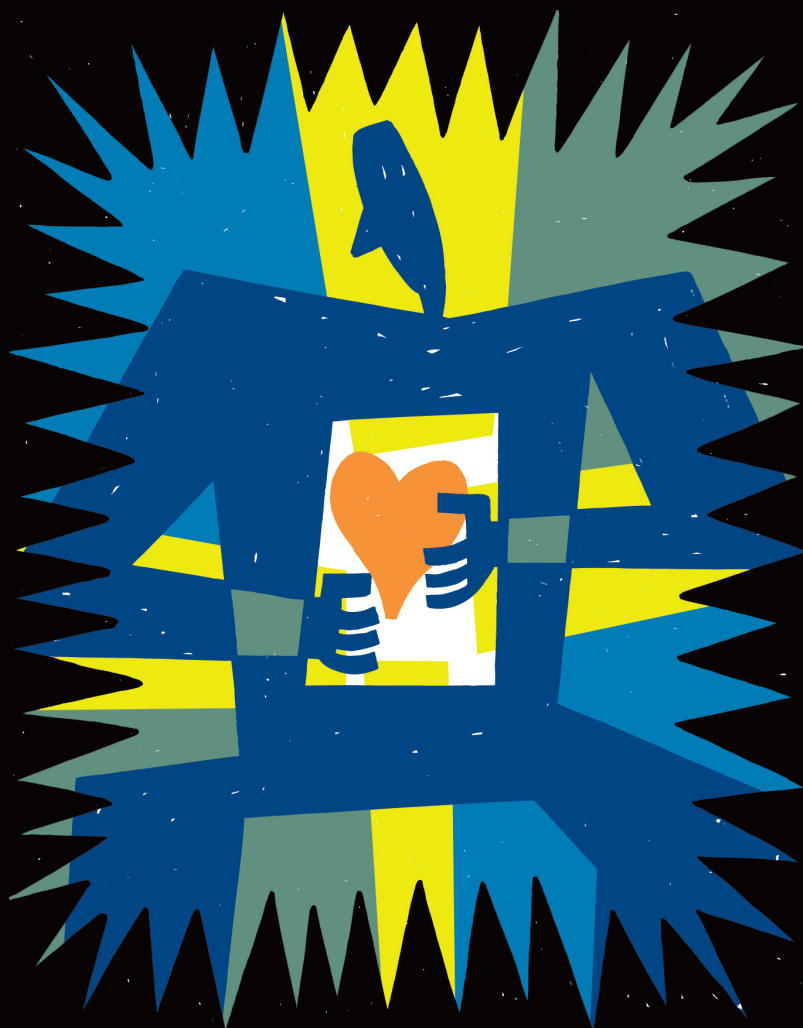

- ◀ Long-Term Follow-Up of the TIPS Early Detection in Psychosis Study: Effects on 10-Year Outcome  
Wenche ten Velden Hegelstad, M.Sc., et al. 374
- Brain Activity in Adolescent Major Depressive Disorder Before and After Fluoxetine Treatment  
Rongrong Tao, M.D., Ph.D., et al. 381
- Neural Correlates of Stress-Induced and Cue-Induced Drug Craving: Influences of Sex and Cocaine Dependence  
Marc N. Potenza, M.D., Ph.D., et al. 406
- Auditory Emotion Recognition Impairments in Schizophrenia: Relationship to Acoustic Features and Cognition  
Rinat Gold, Ph.D., et al. 424
- Continuing Medical Education 441

April 2012

Volume 169 • Number 4

---

Official Journal of the  
AMERICAN PSYCHIATRIC ASSOCIATION

---

[ajp.psychiatryonline.org](http://ajp.psychiatryonline.org)
